# Supplementary material for: La uva de mesa del Vinalopó, un producto de calidad diferenciada
Source: publisher site journal article supplement (doi:10.1515/dx-2022-0020), 2004-01-01
Supplement: Supplementary file 1 [file j_dx-2022-0020_suppl_002.pdf]

## Appendix B: Intern Survey

You just received feedback after presenting a case to your attending. Your attending used a new clinical reasoning feedback tool during this interaction.

Please reflect on the characteristics of the feedback session you just had and answer the questions below.

|                                                                                                        |                                      |                                          |                              |                          |
|--------------------------------------------------------------------------------------------------------|--------------------------------------|------------------------------------------|------------------------------|--------------------------|
| 1. How accurately did the feedback reflect your behaviors during the presentation?                     |                                      |                                          |                              |                          |
| Very inaccurate                                                                                        | Mostly inaccurate                    | Balanced between inaccurate and accurate | Mostly accurate              | Very accurate            |
| 2. How balanced was the feedback in discussing things you did well and areas for improvement?          |                                      |                                          |                              |                          |
| Imbalanced                                                                                             | Somewhat imbalanced                  | Not sure                                 | Somewhat balanced            | Balanced                 |
| 3. How much did you learn about clinical reasoning from this feedback?                                 |                                      |                                          |                              |                          |
| Not at all                                                                                             | Only a little                        | Some                                     | A lot                        | A great deal             |
| 4. How much did you learn about specific terminology about clinical reasoning?                         |                                      |                                          |                              |                          |
| No                                                                                                     | A minimal amount                     | A fair amount                            | A large amount               | A great deal             |
| 5. How well did the feedback provide specific competency areas for you to improve upon?                |                                      |                                          |                              |                          |
| Not at all well                                                                                        | Slightly well                        | Somewhat well                            | Moderately well              | Very well                |
| 6. How helpful was the feedback in setting personal learning goals?                                    |                                      |                                          |                              |                          |
| Not at all helpful                                                                                     | Slightly helpful                     | Somewhat helpful                         | Moderately helpful           | Very helpful             |
| 7. How likely are you to use the feedback to achieve your personal learning goals?                     |                                      |                                          |                              |                          |
| Not at all likely                                                                                      | Slightly likely                      | Somewhat likely                          | Moderately likely            | Very likely              |
| 8. How would you describe the organization of the feedback?                                            |                                      |                                          |                              |                          |
| Not at all structured                                                                                  | Slightly structured                  | Somewhat structured                      | Moderately structured        | Very structured          |
| 9. How would you describe the learning climate during the feedback session?                            |                                      |                                          |                              |                          |
| Very judgmental and intimidating                                                                       | Somewhat judgmental and intimidating | Neutral                                  | Somewhat safe and respectful | Very safe and respectful |
| 10. How motivated did you feel after receiving the feedback to improve your clinical reasoning skills? |                                      |                                          |                              |                          |
| Strongly demotivated                                                                                   | Somewhat demotivated                 | Neutral                                  | Somewhat motivated           | Strongly motivated       |

11. Have you taken this survey before?

- Yes – please proceed to question 18
- No – please proceed to question 12

Now, please think about feedback you received in residency from an attending after presenting a new case. In the next set of questions, please answer the following: **Compared to feedback in the past, today's feedback was \_\_\_\_\_** by indicating where your answer falls on the line.

|     |                                                           |                                                              |                                                           |
|-----|-----------------------------------------------------------|--------------------------------------------------------------|-----------------------------------------------------------|
| 12. | 1-----2-----3-----4-----5                                 |                                                              |                                                           |
|     | Less specific                                             | Equally specific                                             | More specific                                             |
| 13. | 1-----2-----3-----4-----5                                 |                                                              |                                                           |
|     | Harder to Understand                                      | Equally Understandable                                       | Easier to understand                                      |
| 14. | 1-----2-----3-----4-----5                                 |                                                              |                                                           |
|     | Less structured                                           | Equally structured                                           | More structured                                           |
| 15. | 1-----2-----3-----4-----5                                 |                                                              |                                                           |
|     | Less helpful to you in<br>creating learning goals         | Equally helpful to you in<br>creating learning goals         | More helpful to you in<br>creating learning goals         |
| 16. | 1-----2-----3-----4-----5                                 |                                                              |                                                           |
|     | Less helpful to you in<br>creating a plan for improvement | Equally helpful to you in<br>creating a plan for improvement | More helpful to you in<br>creating a plan for improvement |
| 17. | 1-----2-----3-----4-----5                                 |                                                              |                                                           |
|     | Less motivating to<br>continue to improve                 | Equally motivating to<br>continue to improve                 | More motivating to<br>continue to improve                 |

18. What other thoughts did you have about the tool and its relation to feedback?
